# Supplementary material
Source: Elsevier journal article supplement (https://comptes-rendus.academie-sciences.fr/chimie/article/10.1016/j.crci.2019.05.006/file/attach/mmc1.pdf)
Supplement: mmc1 [file mmc1.pdf]

**Supplementary Information (SI)** for the manuscript:

**Magnetic order in a Cu<sup>II</sup>-Dy<sup>III</sup> oxamato-based two-dimensional coordination polymer**

*Alejandro Pascual-Álvarez,<sup>†</sup> Joan Cano,<sup>\*†</sup> Francesc Lloret,<sup>†</sup> Jesús Ferrando-Soria,<sup>†</sup>  
Donatella Armentano<sup>§</sup> and Emilio Pardo<sup>\*†</sup>*

## Experimental Section

**Preparation of  $\text{Li}_2[\text{Cu}(\text{Me}_2\text{pma})_2] \cdot 2\text{H}_2\text{O}$ :** A green polycrystalline solid was obtained from a metathesis from the previously reported tetrabutylammonium complex  $(n\text{-Bu}_4\text{N})_2[\text{Cu}(\text{Me}_2\text{pma})_2] \cdot 2\text{H}_2\text{O}$  (4.8 g, 5 mmol), with  $\text{AgNO}_3$  (1.70 g, 10 mmol) and  $(\text{LiCl})$  (0.42 g, 10 mmol) in 25 mL of water. After eliminating  $\text{AgCl}$  by filtration, the solution was evaporated to dryness. The solid was collected and washed with a small amount of ethanol, acetone and diethyl ether and dried under vacuum. (2.31 g, 89 %). Elemental analysis calcd (%) for  $\text{C}_{20}\text{H}_{22}\text{N}_2\text{O}_8\text{Li}_2\text{Cu}$  (495.8): C 48.45, H 4.47, N 5.65; found: C 48.32, H 4.21, N 5.66; IR (KBr):  $\nu = 1653, 1621 \text{ cm}^{-1}$  (C=O).

**Theoretical calculations.** The calculations were carried out with the version 4.0 of the ORCA programme,<sup>1</sup> using the TZVP basis set proposed by Ahlrichs<sup>2</sup> and the auxiliary TZV/C Coulomb fitting basis sets.<sup>3</sup> Relativistic effects were introduced from a zero-order regular approximation (ZORA).<sup>4</sup> Segmented all-electron relativistically contracted set for use with the ZORA Hamiltonian was employed for the dysprosium atom.<sup>5</sup> RIJCOSX method was used combining resolution of the identity (RI) and "chain of spheres" COSX approximations for the Coulomb and exchange terms, respectively.<sup>6</sup>

---

<sup>1</sup> F. Neese, *Wiley Interdiscip. Rev.: Comput. Mol. Sci.*, 2012, **2**, 73

<sup>2</sup> (a) A. Schafer, H. Horn and R. Ahlrichs, *J. Chem. Phys.*, 1992, **97**, 2571; (b) A. Schafer, C. Huber and R. Ahlrichs, *J. Chem. Phys.*, 1994, **100**, 5829

<sup>3</sup> (a) K. Eichkorn, O. Treutler, H. Ohm, M. Haser and R. Ahlrichs, *Chem. Phys. Lett.*, 1995, **240**, 283; (b) K. Eichkorn, O. Treutler, H. Ohm, M. Haser and R. Ahlrichs, *Chem. Phys. Lett.*, 1995, **242**, 652; (c) K. Eichkorn, F. Weigend, O. Treutler, H. Ohm and R. Ahlrichs, *Theor. Chem. Acc.*, 1997, **97**, 19.

<sup>4</sup> C. Chang, M. Pelissier and Ph. Durand, *Phys. Scr.*, 1986, **34**, 394.

<sup>5</sup> (a) doi: 10.1021/ct800047t.; (b) DOI: 10.1021/ct800172j; (c) 10.1021/ct900090f; (d) 10.1021/ct100736b; (e) 10.1007/s00214-012-1292-x.

<sup>6</sup> (a) S. Kossmann and F. Neese, *J. Chem. Theory Comput.*, 2010, **6**, 2325; (b) S. Kossmann and F. Neese, *Chem. Phys. Lett.*, 2009, **481**, 240.

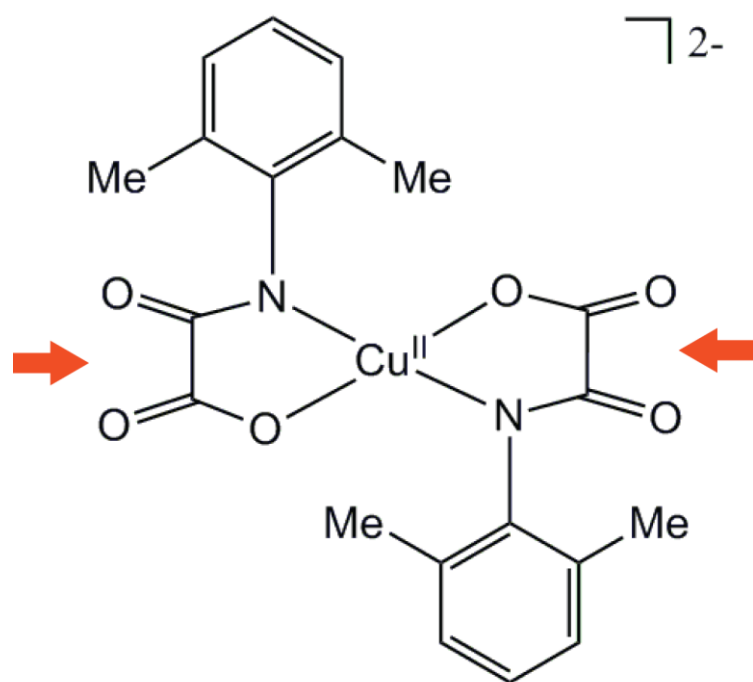

**Scheme S1.** Chemical structure of the mononuclear copper(II) anionic complex of formula  $[Cu^{II}(Me_2pma)_2]^{2-}$ , highlighting the free carbonyl groups acting as potential coordination sites (orange arrows).

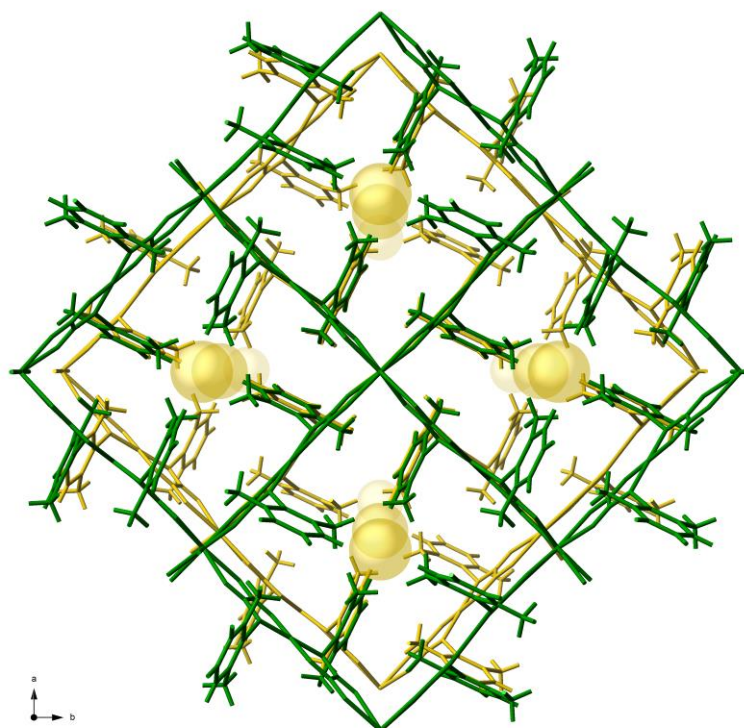

**Figure S1.** Crystal packing view of **1** along the *c* axis showing small hydrophobic voids. The coordination networks are represented with yellow and green sticks. The gold spheres represent the void space.

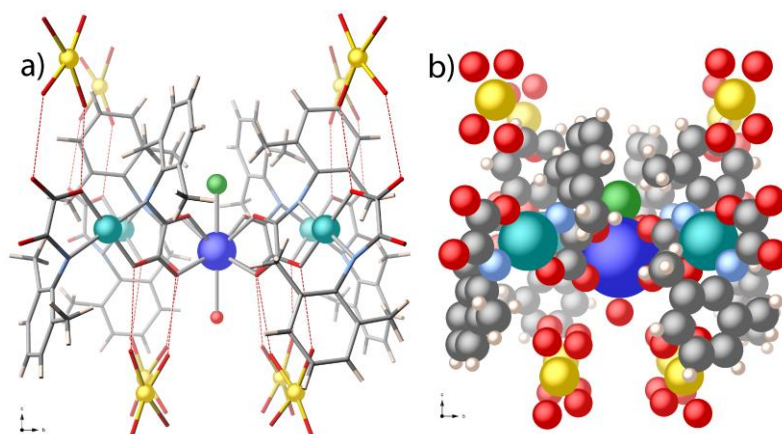

**Figure S2.** Perspective view, as balls and sticks and space filling model (a-b), of Dy(III) environment details in the  $\{\text{Dy}^{\text{III}}[\text{Cu}(\text{Me}_2\text{pma})_2]_2\text{Cl}(\text{H}_2\text{O})\}^{2-}$  square-grids motif in **1**, interconnected by H-bonded  $\text{Li}(\text{H}_2\text{O})_4^+$  ions (red dashed lines) showing the basket-like cavity generated filled by water molecules and Chlorine atoms.

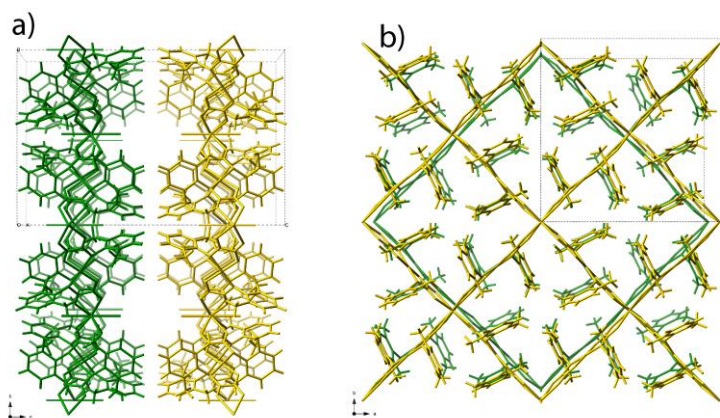

**Figure S3.** Perspective views of the eclipsed packing of the adjacent layers of **1** along the *c* (a) and *c* (b) axis, respectively. The two adjacent planes are depicted in yellow and green colors. The counteranions and the solvent molecules have been omitted for clarity.

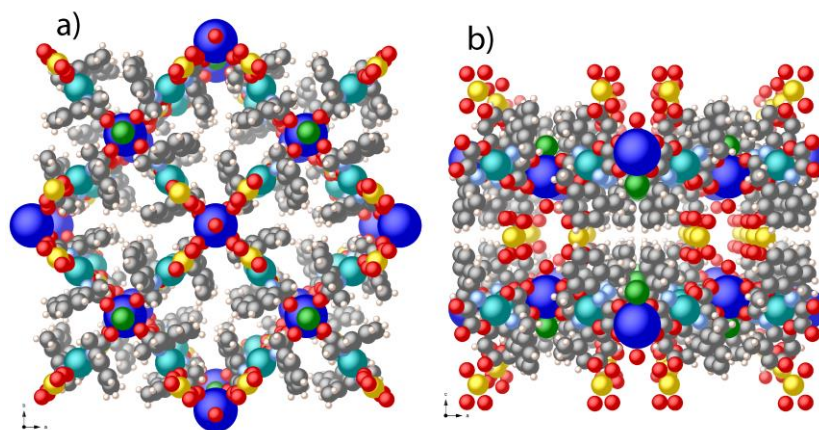

**Figure S4.** Space filling views along *c* and *b* directions of  $\{\text{Dy}^{\text{III}}[\text{Cu}(\text{Me}_2\text{pma})_2\text{Cl}(\text{H}_2\text{O})]^{2-}$  square-grids interconnected by  $\text{Li}(\text{H}_2\text{O})_4^+$  ions (a-b). Cu, Dy, Li, O, N, C and H atoms are depicted as green, blue, gold, red, sky blue, gray and white spheres, respectively.

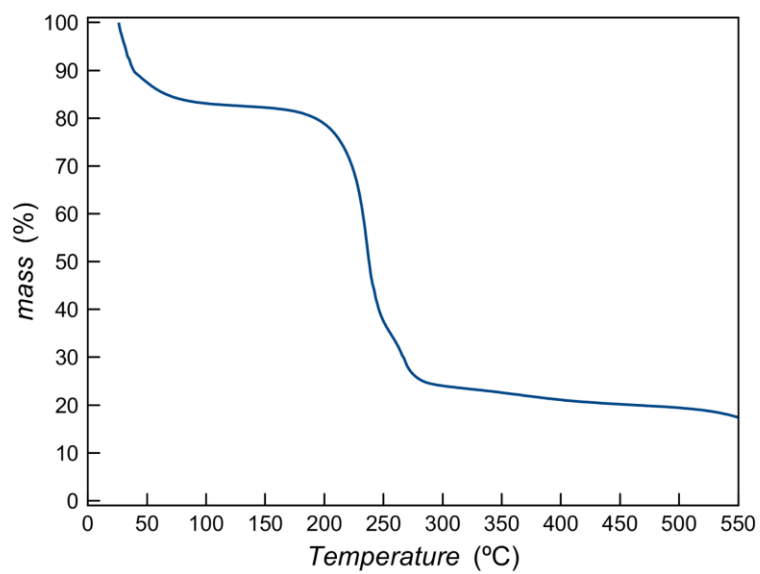

**Figure S5.** Thermogravimetric Analysis of **1** under dry N<sub>2</sub> atmosphere in the 25-550 °C range.



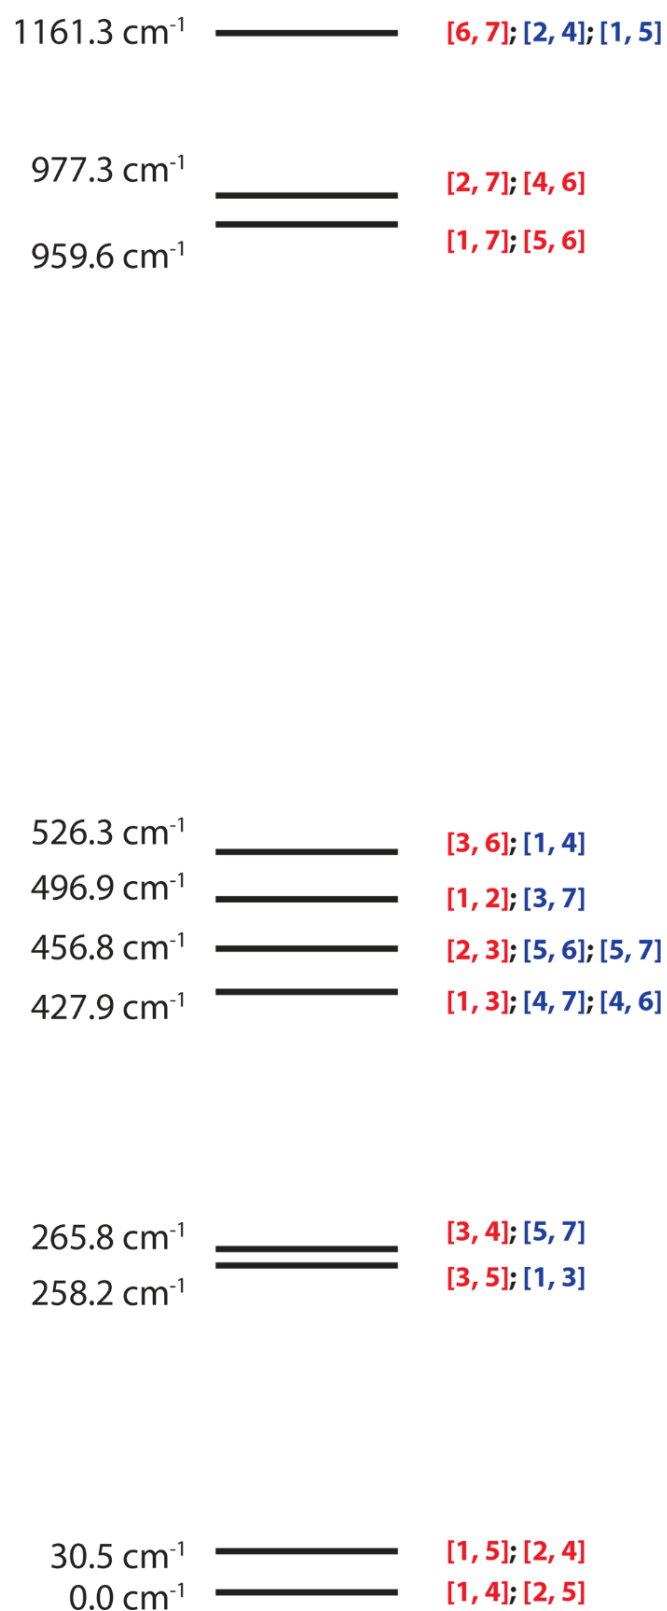

**Fig. S6.** Schematic energy diagram of the splitting of the  ${}^6H$  term by crystal field in **1**. Values correspond to the energies in  $\text{cm}^{-1}$ . Labels show the electronic configurations that mainly contribute to a particular state. Red and blue colors are used for strong and moderate contributions. Each electronic configuration is noted indicating the electrons occupy an f orbital following the energetic order displayed in Fig. 7:  $\{f_{-1}, f_{+1}, f_{-2}, f_{+3}, f_{-3}, f_0, f_{+2}\}$ . In the shown electronic configurations, one electron is placed in each one of these f orbitals and only a second electron is in  $i$  and  $j$  orbitals, being  $[i, j]$  a simplified notation of an electronic configuration. Thus,  $[1,3]$  refers to the  $\{2,1,2,1,1,1,1\}$  electronic configuration.
